# Supplementary material for: RT-PCR/MALDI-TOF diagnostic target performance reflects circulating SARS-CoV-2 variant diversity in New York City
Source: bioRxiv or medRxiv preprint supplement (doi:10.1101/2021.12.04.21267265), 2021-12-07

Figure S1

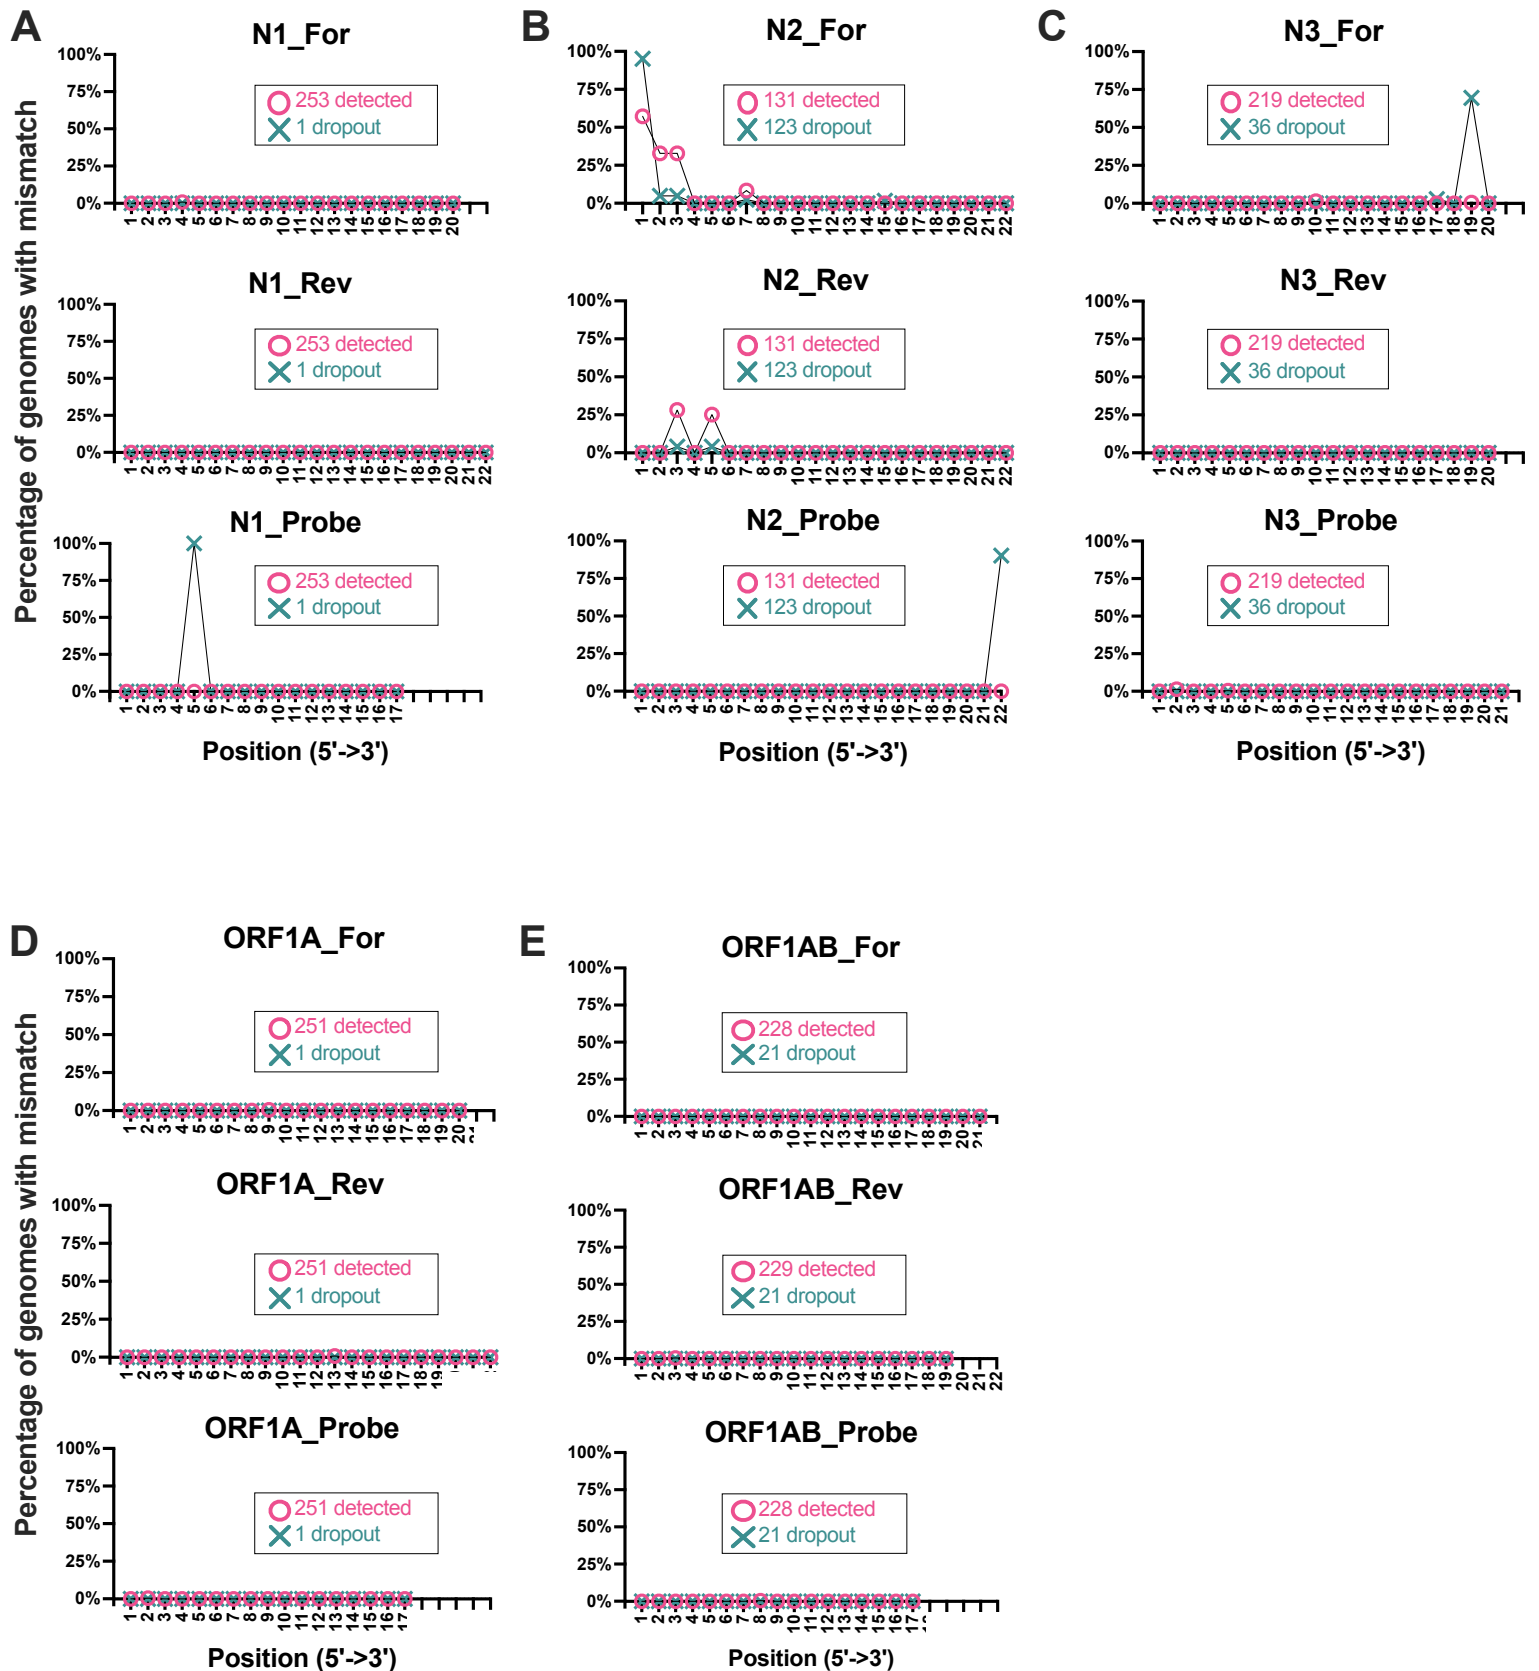

Supplement: Supplementary file [file media-2.pdf]
